# Supplementary material
Source: publisher figshare collection journal article supplement (https://aacr.figshare.com/articles/dataset/_/22674264)
Supplement: Supplementary file 1 [file 40243590]

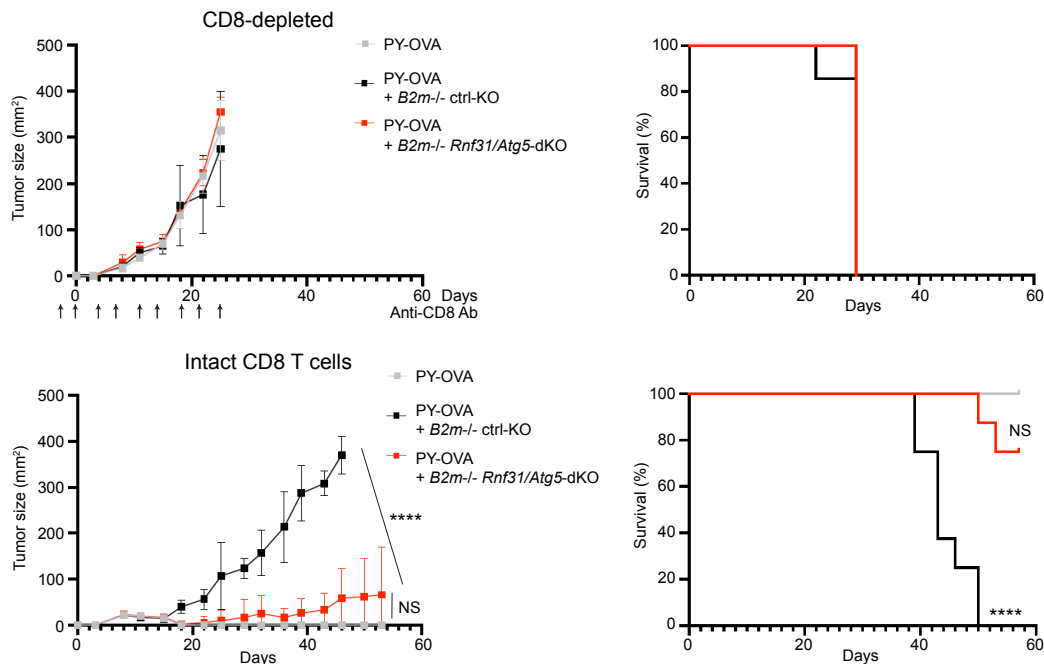

**B**

Growth curve of gene knockout tumors

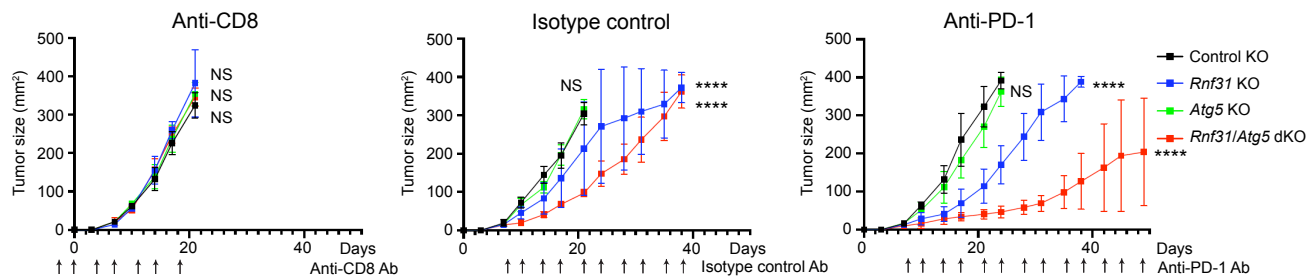

**C**

Tumor size in each mouse

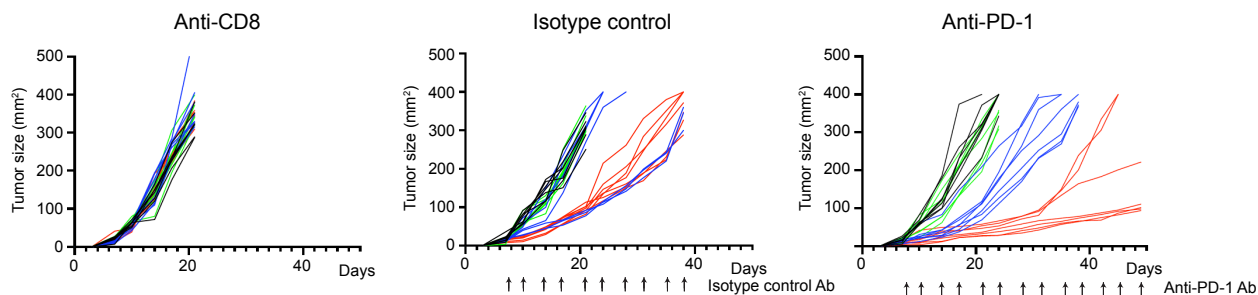

**D**

Survival of mice inoculated with gene knockout tumor cells

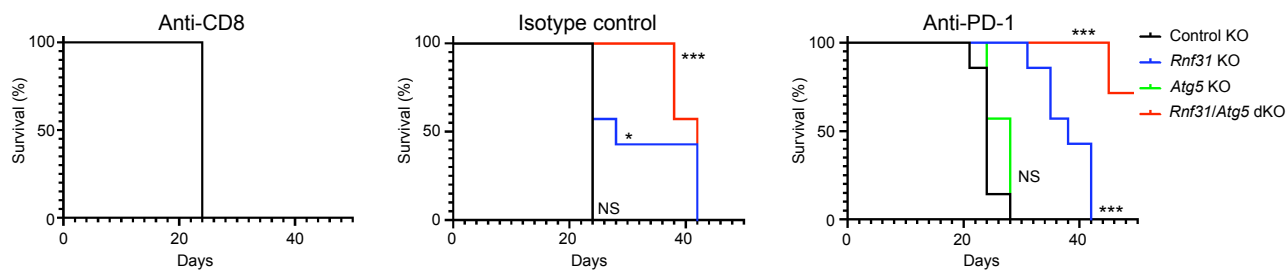

**Supplementary Fig. S8. CD8 T cell-dependent control of tumors containing a *B2m*<sup>-/-</sup> population with inactivated *Rnf31* and *Atg5* genes.**

(A) Impact of CD8 T cells on growth of mixed Py8119-Ova tumors with a *B2m*<sup>-/-</sup> population. Orthotopic injections were performed with only Py8119-Ova tumor cells (grey), a 4:1 mixture of Py8119-Ova plus Py-*B2m*<sup>-/-</sup> ctrl-KO tumor cells (black) or a 4:1 mixture of Py8119-Ova plus Py-*B2m*<sup>-/-</sup> *Rnf31/Atg5*-dKO tumor cells (red) (n=7-8 mice/group). Mice received either a CD8 depleting or an isotype control antibody (days -1, 0 and then twice weekly). Tumor growth (left) and survival (right panel) were recorded.

(B-D) CD8 T cell-dependent impact of *Rnf31* and/or *Atg5* gene inactivation in *B2m*<sup>+/+</sup> B16F10 melanoma cells (B16F10). B16-ctrl KO, B16-*Rnf31* KO, B16-*Atg5* KO or B16-*Rnf31/Atg5* dKO cells ( $4 \times 10^5$ ) were injected subcutaneously. Treatment with PD-1 or isotype control antibodies was initiated when tumors were palpable (day 7). Alternatively, CD8 T cells were depleted (antibody was administered on days -1 and 0 and then twice weekly). Tumor growth (B-C) and survival (D) were recorded (n=8 mice/group).

Data are representative of two experiments and depicted as the mean  $\pm$  SEM. Statistical significance was assessed by a two-way ANOVA with Dunnett's post hoc test (tumor growth in A, B) and Kaplan-Meier log-rank (Mantel-Cox) test (survival in A and D). \*\*\*\*p < 0.0001; \*\*\*p < 0.001; \*p < 0.05; NS, not significant.
